# Supplementary material
Source: PubMed Central journal article supplement (PMC4378180)
Supplement: supp_pp.15.00094_00094revsuppdata.pdf [file supp_pp.15.00094_00094revsuppdata.pdf]

Supplemental figure S1

A

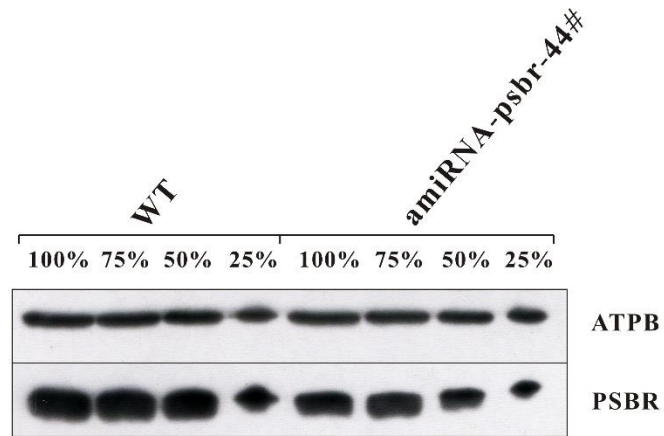

B

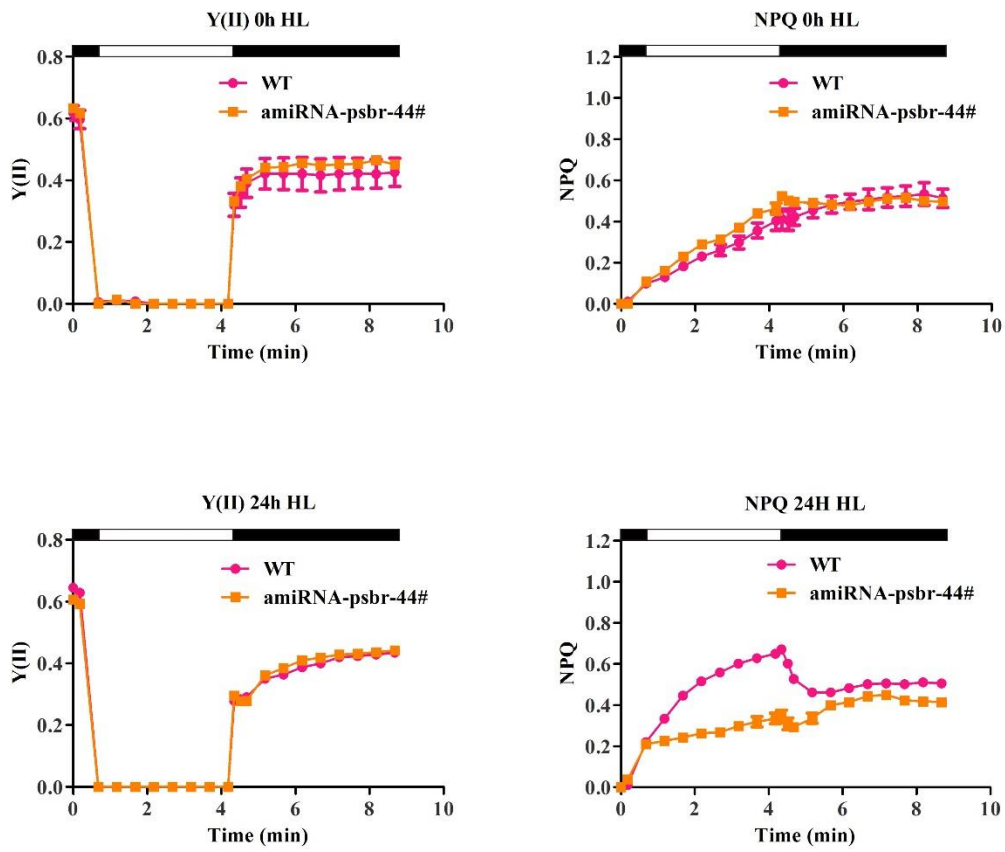

C

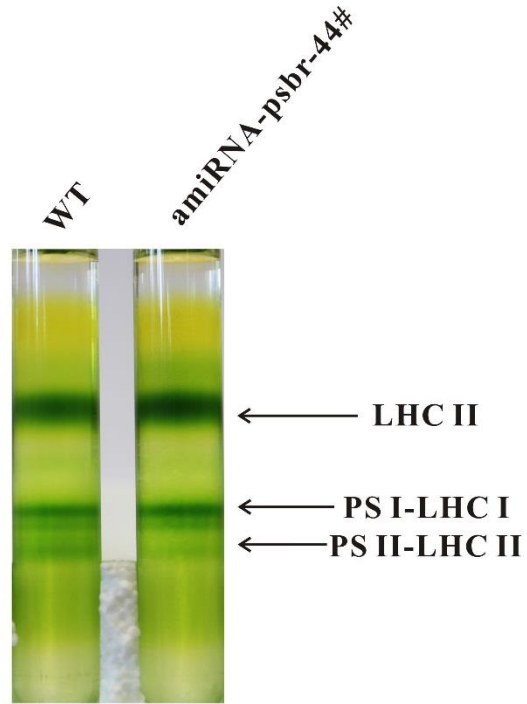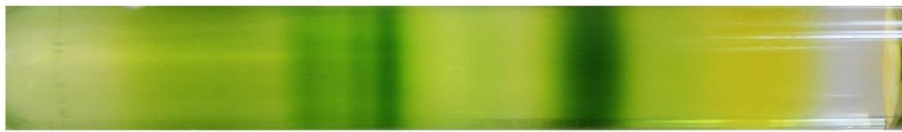

1.3M → 0.1M

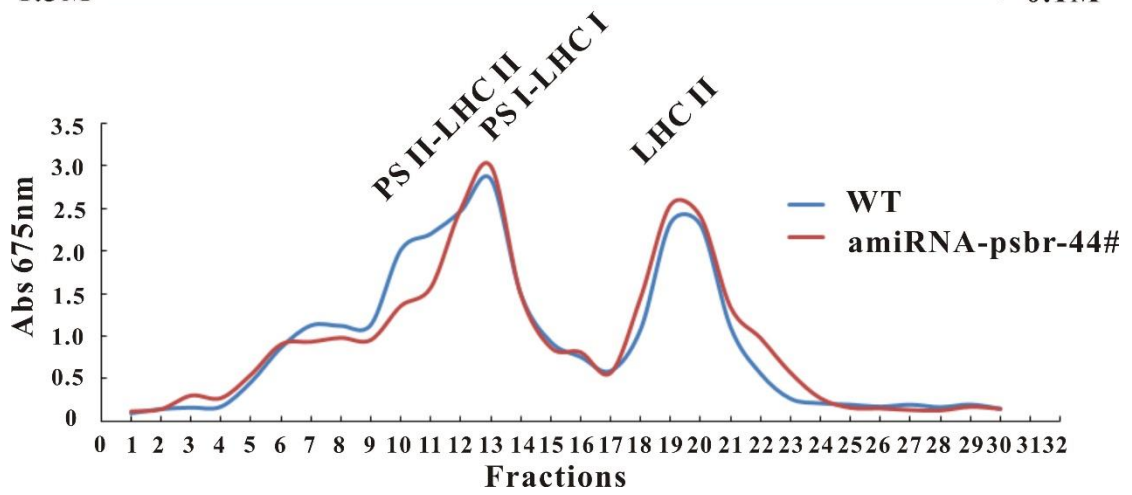

D

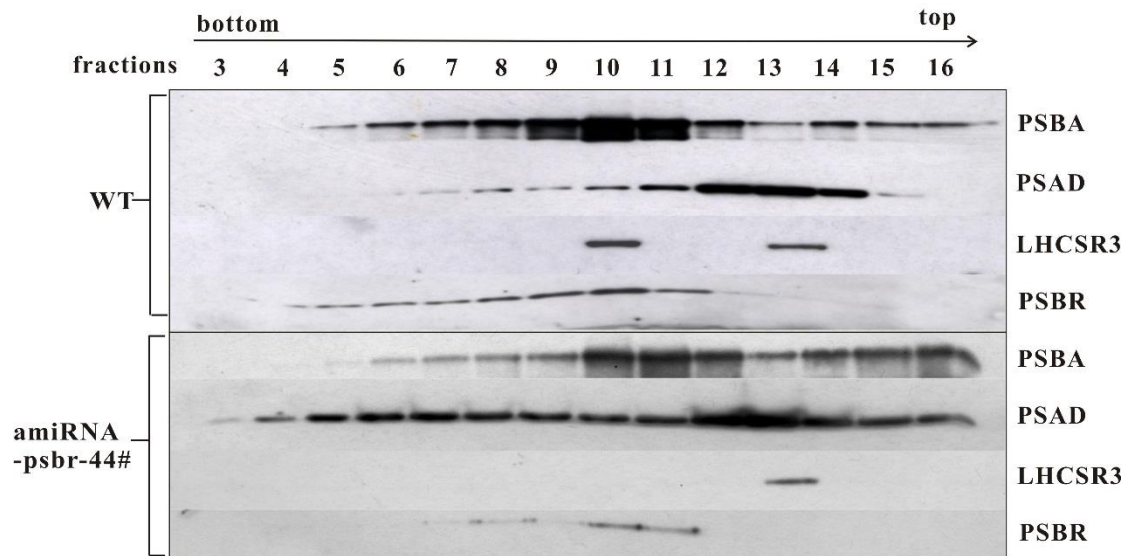

**Figure S1.** Immunoblot analysis of thylakoid membrane and sucrose density gradients and PSII quantum yield and NPQ induction of WT and *amiRNA-psbr-44#*

(A) WT and *amiRNA-psbr-44#* were grown in TAP medium at LL ( $20 \mu\text{E m}^{-2} \text{s}^{-1}$ ) and then shifted to HL ( $200 \mu\text{E m}^{-2} \text{s}^{-1}$ ) in HSM medium for 24h. Afterwards, isolated thylakoids were separated on a 13 % SDS-PAGE and analyzed by immunoblotting using anti-PsbR antibodies. 6  $\mu\text{g}$  chlorophyll equals 100 %, ATPB served as loading control. (B) Cells were grown in TAP medium under LL and then shifted to HL and HSM for 24h. Y(II) and NPQ were measured after 0h and 24h HL treatment. (C) Sucrose density gradients of thylakoid membranes from WT and *amiRNA-psbr-44#*. Thylakoid isolated from 24h HL treatment cells were solubilized with 1.0 %  $\alpha$ -DM and separated by sucrose density gradient ultracentrifugation. SDGs were fractionated and measured as (Figure 5 B). (D) Immunoblot analysis of SDG fractions 3-16 from 24h HL of WT and *amiRNA-psbr-44#*. Sample preparation and Immunoblotting were performed as in (Figure 6 A)

Supplemental figure S2

A

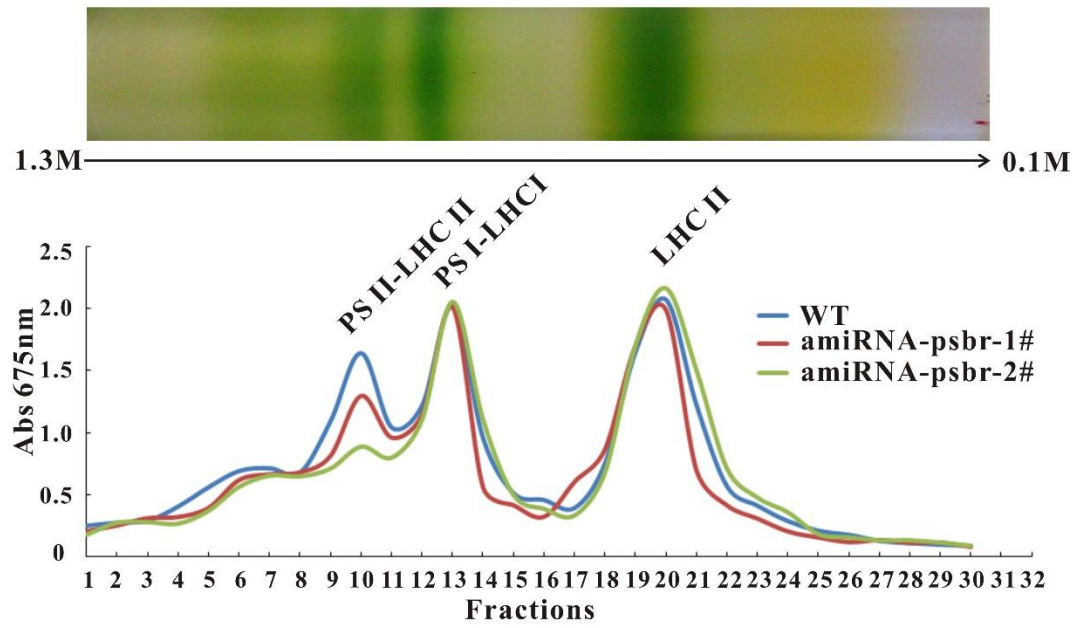

B

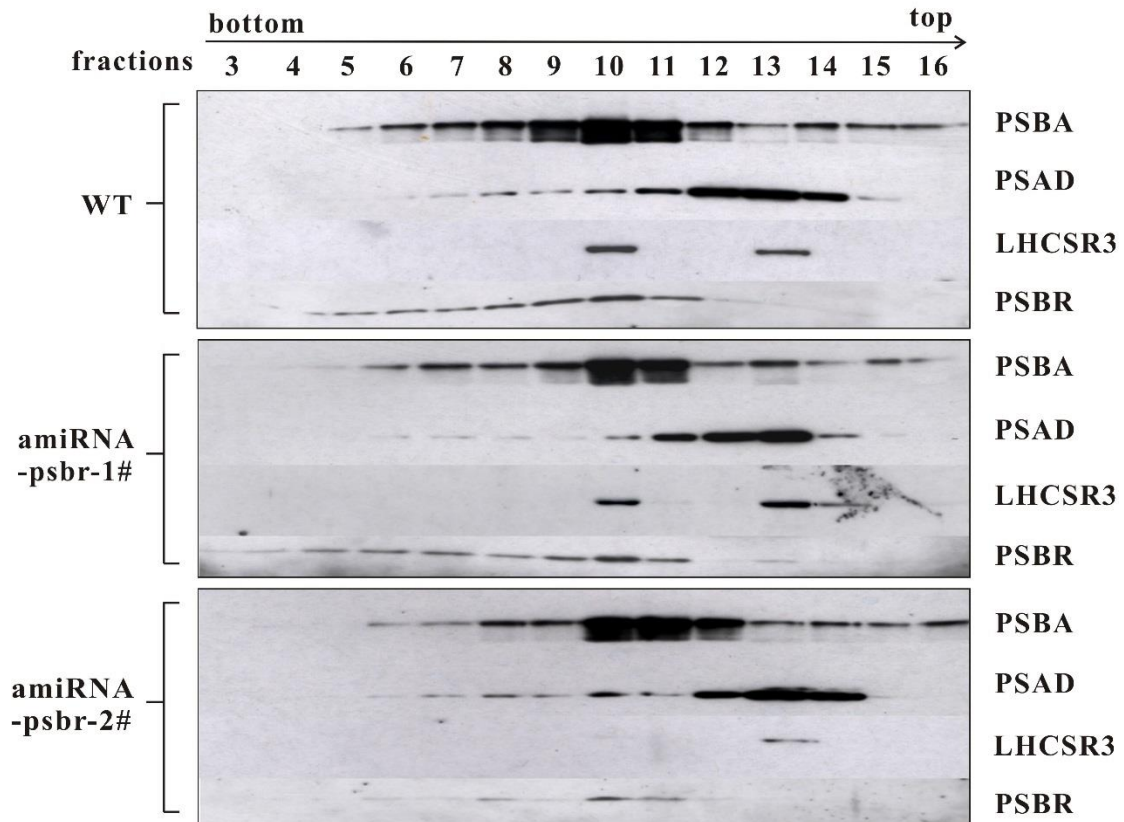

C

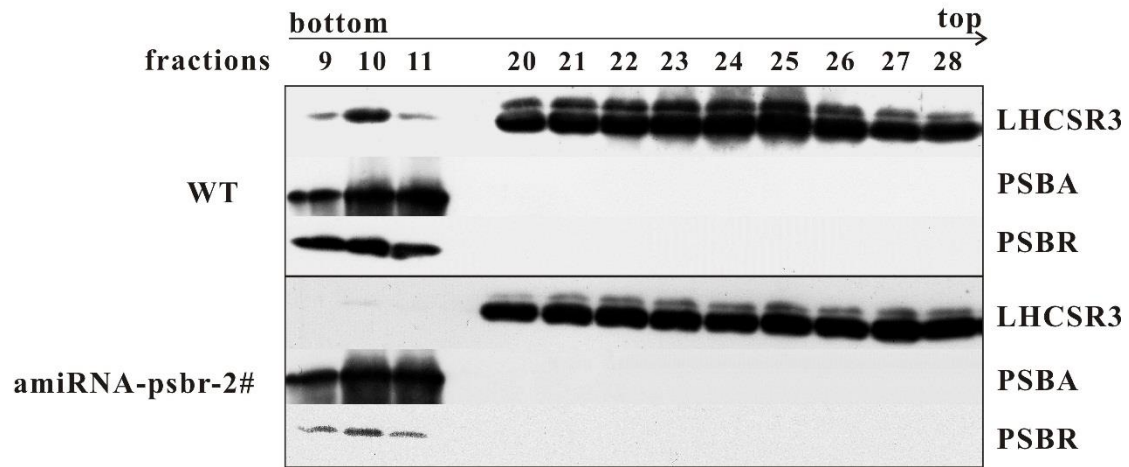

**Figure S2.** Absorbance measurement and immunoblot analysis of SDG fractions from 24h HL WT and PSBR Knock-down strains

(A) SDGs of 24h HL of WT, *ami-RNA-psbr-1#* and *ami-RNA-psbr-2#* were fractionated and measured as (Figure 5 B). (B) Immunoblot analysis of SDG fractions 3-16 from 24h HL of WT and *ami-RNA-psbr* lines. Sample preparation and Immunoblotting were performed as in (Figure 6 A). (C) 24h (fractions 9-11 and 20-18) HL of WT and *ami-RNA-psbr-2#* were subjected to immunoblotting with an anti-LHCSR3, PSBA PSBR antibody. Sample preparation was performed as in (B).

Supplemental figure S3

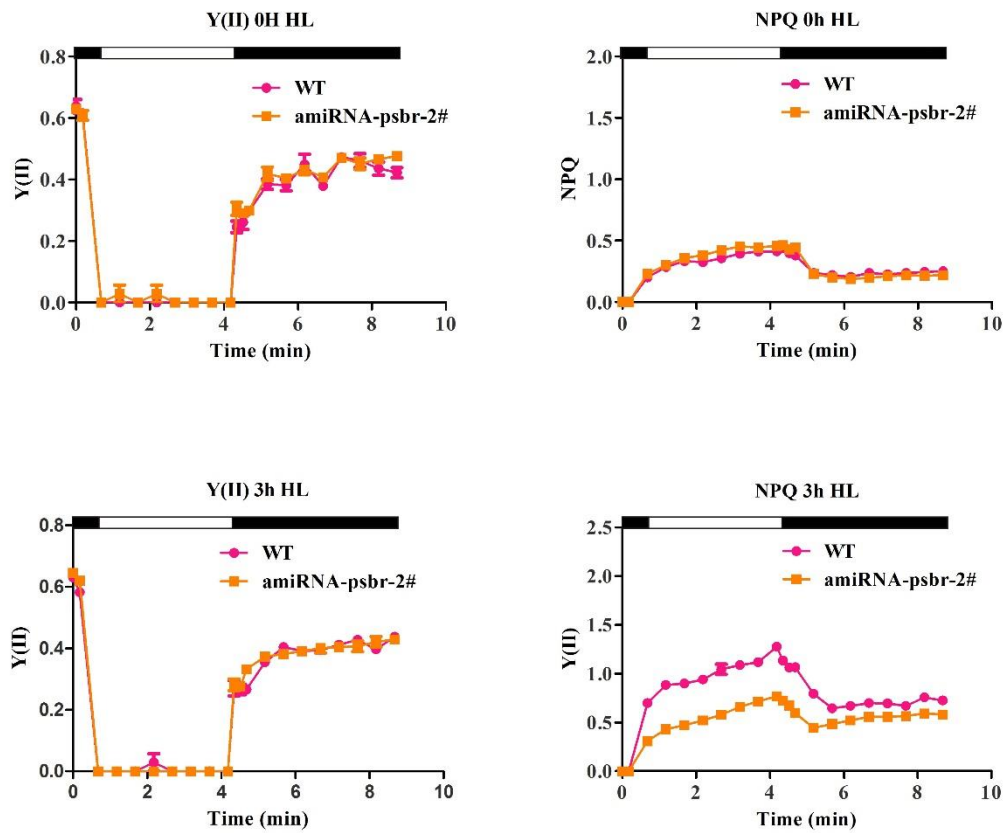

**Figure S3.** PSII quantum yield and NPQ induction of WT and *ami-RNA-psbr-2#* from 3h HL cells

Cells were grown in TAP medium under LL and then shifted to HL and HSM for 3h.

**Supplemental Table S1.** Quantitative proteomics data of Figure 7A

| Protein                    | Peptides                     | Ratio mean<br>( <sup>14</sup> N/ <sup>15</sup> N) | SD       |
|----------------------------|------------------------------|---------------------------------------------------|----------|
| PSBA                       | ANLGMEVMHER                  | 1.285723                                          | 0.127054 |
|                            | ETTENESANEGYR                |                                                   |          |
|                            | FGQEEETYNIIVAAHGYFGR         |                                                   |          |
|                            | LIFQYASFNNSR                 |                                                   |          |
|                            | VLNTWADIINR                  |                                                   |          |
| PSBD                       | AAEDPEFETFYTK                | 1.200534                                          | 0.121991 |
|                            | AFNPTQAEETYSMTANR            |                                                   |          |
|                            | AWMAAQDQPHER                 |                                                   |          |
|                            | AYDFVSQEIR                   |                                                   |          |
|                            | LVFPEEVLPR                   |                                                   |          |
|                            | FWSQIFGVAFSNK                |                                                   |          |
|                            | TWFDDADDWLR                  |                                                   |          |
| PSBH                       | VNSDFQEPGLVTPGLTLLR          | 1.253401                                          | 0.055727 |
|                            | VNSDFQEPGLVTPGLTLLRPLNSEAGK  |                                                   |          |
| PSBO                       | EDDGIDYAATTVQLPGER           | 1.286167                                          | 0.260808 |
|                            | GDFLVPSYR                    |                                                   |          |
|                            | GGSTGYDNAVALPAR              |                                                   |          |
|                            | GGSTGYDNAVALPARADAEELLKENVK  |                                                   |          |
|                            | LYTLDAMSGSFK                 |                                                   |          |
|                            | VDPVTGEIAGVFESIQPSDIDLAKPPK  |                                                   |          |
|                            | VGSDGSAELKEDDGIDYAATTVQLPGER |                                                   |          |
|                            | VTGLWYAQLK                   |                                                   |          |
| PSBP                       | ENDFPGVILR                   | 1.811229                                          | 0.073269 |
|                            | FLESVSYLLGK                  |                                                   |          |
|                            | QAYSGETQSEGGFAPNR            |                                                   |          |
|                            | SGFVVPYAGDGFALLPAK           |                                                   |          |
|                            | VSAASLLDVSTTTDKK             |                                                   |          |
|                            | YEDNFDVNNLVIAQDITDKK         |                                                   |          |
| PSBQ                       | DLDLPQNR                     | 1.717382                                          | 0.391841 |
|                            | EFIQAVEDLDFALR               |                                                   |          |
|                            | KEFIQAVEDLDFALR              |                                                   |          |
|                            | GFDLIYEAR                    |                                                   |          |
|                            | IDADLDVFIQK                  |                                                   |          |
| PSBW                       | DLGDFEDADDGLKL               | 1.250466                                          | 0.034870 |
|                            | DLGDFEDADDGLK                |                                                   |          |
| LHCB4                      | FADGLNNGK                    | 1.189483                                          | 0.162436 |
|                            | FPTPPGTQK                    |                                                   |          |
|                            | GFDPLGLSKPSEFVVIGVDENDQNAAK  |                                                   |          |
|                            | KYQGDALWLPNTRPEWLDGSLPGDR    |                                                   |          |
| LAMVSFFGYGVQALSTGEGALGSLAK |                              |                                                   |          |

| Protein                 | Peptides                                                                                                                                                                                     | Ratio mean<br>( <sup>14</sup> N/ <sup>15</sup> N) | SD       |
|-------------------------|----------------------------------------------------------------------------------------------------------------------------------------------------------------------------------------------|---------------------------------------------------|----------|
| LHCB4                   | LAPYSEVFGLAR<br>PEWLDGSLPGDR<br>PSEFVVIGVDENDQNAAK<br>YQGDALWLPNTRPEWLDGSLPGDR                                                                                                               | 1.189483                                          | 0.162436 |
| LHCB5                   | ENELLHAR<br>GWLGGQGAADLDK<br>GWLGGQGAADLDK WYGPDR<br>HVADPFYNYLLTVLGAEER<br>LFLPSGLYDR<br>NGTGPAGYSPGIGK<br>WAMLAAGILPEGLQANGANIK<br>SEIPEYLNAGELAGDYGYDPLGLGK<br>YRENELLHAR                 | 1.207260                                          | 0.167547 |
| LHCBM1                  | ASTPDSFWYGPDR<br>GPLQNLSDHLANPGTNNAFAYATK<br>LYPGGSFDPLGLADDPDTFAELK<br>VNGGPLGEGLDK                                                                                                         | 1.026265                                          | 0.198301 |
| LHCBM3                  | GPIQNLDDHLSNPTVNNAFAFATK<br>QAPASSGIEFYGPNR<br>SGTQFGEAVWFK                                                                                                                                  | 0.973797                                          | 0.241609 |
| LHCBM4<br>and<br>LHCBM6 | GPVQNLDDHLANPTVNNAFAFATK                                                                                                                                                                     | 1.317567                                          | 0.076375 |
| LHCBM2<br>and<br>LHCBM7 | ANGGPLGEGLDPLHPGGAFDPLGLADDPDTFAELK<br>NGIPFGEAVWFK                                                                                                                                          | 1.164885                                          | 0.440862 |
| LHCBM5                  | VNGGPAGEGLDK                                                                                                                                                                                 | 1.037268                                          | 0.327399 |
| CP43                    | FDEPVLSMR<br>AMYFGGVYDTWAPGGGDVDR<br>DQETTGFVWWSGNAR<br>FDEPVLSMRPLD<br>GIDRFDEPVLSMRPLD<br>GPWLEPLR<br>LGANVASAQGPTGLGK<br>LKNDIQPWQER<br>NDIQPWQER<br>SPTGEIIFGGETMR<br>VITNPTTNAAVIFGYLVK | 1.358915                                          | 0.288501 |
| CP47                    | AQLGEIFEFDK<br>DVFAGIDDDINDQVEFGK<br>KAQLGEIFEFDK<br>KLGDTSSLR                                                                                                                               | 1.292974                                          | 0.247392 |



| Protein | Peptides                                                                                                                                                                                                                                                            | Ratio mean<br>( <sup>14</sup> N/ <sup>15</sup> N) | SD       |
|---------|---------------------------------------------------------------------------------------------------------------------------------------------------------------------------------------------------------------------------------------------------------------------|---------------------------------------------------|----------|
| CP47    | LAFYDYIGNNPAK<br>LGD TSSLR<br>MPTFFETFPVLLLDK<br>MPTFFETFPVLLLDKDGIVR<br>QGMFVLPFMTR<br>RMPTFFETFPVLLLDK<br>STLQSDGVFR<br>TGAMNSGDGIAGWLGHASFK<br>VHTVVINDPGR<br>VQASLAEGASLSDAWSR<br>YQWDQGFFQQEIQK                                                                | 1.292974                                          | 0.247392 |
| LHCSR3  | DLGLPVTPLPDNLK<br>EAILELDDIER                                                                                                                                                                                                                                       | 2.305342                                          | 0.127054 |
| PSBR    | VGLNSIEDPVVK<br>YGANVDGYSPIYTPDLWTESGDSYTLGTK                                                                                                                                                                                                                       | 3.297521                                          | 0.317235 |
| α-CF1 " | AIESPAPGIVAR<br>SVYEPLATGLVAVDAMIPVGR<br>TAIAVDTILNQK<br>TPEELSNLIK<br>IAEIPVGEAYLGR                                                                                                                                                                                | 0.939444                                          | 0.077343 |
| β-CF1   | DGSITSIQAVYVPADDLTDPA PATTF AHL DATTVLSR<br>ELQDIIAILGLDELSEEDR<br>FVQAGAEVSALLGR<br>GMEVVDTGKPLSVPVGK<br>IFAGELDDLPEQAFYLVGNITEAISK<br>IFNVLGEPVDNMGNVK<br>MPSAVGYQPTLATEMGG LQER<br>QDV LFFIDNIFR<br>TAPAFV DLDTR<br>TVLIMELINNI AK<br>VALTALTMAEYFR<br>VVDLLAPYR | 0.995517                                          | 0.155767 |

**Supplemental Table S2.** Quantitative proteomics data of Figure 7B

| Protein                  | Peptides                           | Ratio mean<br>( <sup>14</sup> N/ <sup>15</sup> N) | SD       |
|--------------------------|------------------------------------|---------------------------------------------------|----------|
| PSBA                     | ANLGMEVMHER                        | 1.351819                                          | 0.223429 |
|                          | FGQEEETYNIVA AHGYFGR               |                                                   |          |
|                          | LIFQYASFNNSR                       |                                                   |          |
|                          | VLNTWADIINR                        |                                                   |          |
| PSBD                     | AAEDPEFETFYTK                      | 1.106439                                          | 0.099573 |
|                          | AFNPTQAEETYSMVTANR                 |                                                   |          |
|                          | AYDFVSQEIR                         |                                                   |          |
|                          | LVFPPEVLPR                         |                                                   |          |
|                          | NILLNEGIR                          |                                                   |          |
|                          | TWFDDADDWLR                        |                                                   |          |
| PSBH                     | VNSDFQEPGLVTPGLTLLR                | 0.989421                                          | 0.217864 |
| PSBO                     | ADAEELLKENVK                       | 1.273401                                          | 0.292776 |
|                          | EDDGIDYAATTVQLPGER                 |                                                   |          |
|                          | GDFLVPSYR                          |                                                   |          |
|                          | GGSTGYDNAVALPAR                    |                                                   |          |
|                          | LYTLDAMSGSFK                       |                                                   |          |
|                          | VAFLFYTK                           |                                                   |          |
|                          | VDPVTGEIAGVFESI QPSDTDLGAKPPK      |                                                   |          |
|                          | VGSDGSAELKEDDGIDYAATTVQLPGER       |                                                   |          |
|                          | VTGLWYAQLK                         |                                                   |          |
|                          | VTGLWYAQLK                         |                                                   |          |
| PSBP                     | ENDFPGVILR                         | 1.467983                                          | 0.131825 |
|                          | FLESVSYLLGK                        |                                                   |          |
|                          | QAYSGETQSEGGFAPNR                  |                                                   |          |
|                          | SGFVPYAGDGFALLPAK                  |                                                   |          |
|                          | VSAASLLDVSTTTDKK                   |                                                   |          |
|                          | YEDNFDVNNLVVIAQDQDKK               |                                                   |          |
| PSBQ                     | DLDLQNVNR                          | 1.237611                                          | 0.106663 |
|                          | EFIQAVEDLDFALR                     |                                                   |          |
|                          | FDLNLTASTK                         |                                                   |          |
|                          | IDADLDVFIQK                        |                                                   |          |
| PSBW                     | DLGDFEDADDGLK                      | 1.221623                                          | 0.051973 |
| LHCB4                    | GFDPLGLSKPSEFVVIGVDENDQNAAK        | 1.088816                                          | 0.114001 |
|                          | GSVEAIVQATPDEVSSNR                 |                                                   |          |
|                          | KYQGDALWLPNTRPEWLDGSLPGDR          |                                                   |          |
|                          | LAPYSEVFLAR                        |                                                   |          |
|                          | PSEFVVIGVDENDQNAAK                 |                                                   |          |
| YQGDALWLPNTRPEWLDGSLPGDR |                                    |                                                   |          |
| LHCB5                    | FDSSVFDGLDPLYPGGPFDPGLLADDPEVLQELK | 1.072036                                          | 0.255306 |
|                          | GWLGGQGGAADLDK                     |                                                   |          |
|                          | HVADPFGYNLLTVLGAEER                |                                                   |          |

| Protein                 | Peptides                                                                                                                                                                                                            | Ratio mean<br>( <sup>14</sup> N/ <sup>15</sup> N) | SD       |
|-------------------------|---------------------------------------------------------------------------------------------------------------------------------------------------------------------------------------------------------------------|---------------------------------------------------|----------|
| LHCB5                   | KLFLPSGLYDR<br>LFLPSGLYDR<br>NGTGPAGYSPGIGK<br>SEIPEYLNAGELAGDYGYDPLGLGK<br>WAMLAAAGILPEGLQANGANIK                                                                                                                  | 1.072036                                          | 0.255306 |
| LHCBM1                  | ASTPDSFWYGPER<br>PLQNSDHLANPGTNNAFAYATK<br>LYPGGSFDPLGLADDPDTFAELK<br>VNGGPLGEGLDK                                                                                                                                  | 1.303171                                          | 0.251581 |
| LHCBM3                  | GPIQNDDHLSNPTVNNAFAFATK<br>QAPASSGIEFYGNR<br>SGTQFGEAVWFK                                                                                                                                                           | 1.181249                                          | 0.276587 |
| LHCBM4<br>and<br>LHCBM6 | GPVQNDDHLANPTVNNAFAFATK                                                                                                                                                                                             | 1.476974                                          | 0.009663 |
| LHCBM2<br>and<br>LHCBM7 | ANGGPLGEGLDPLHPGGAFDPLGLADDPDTFAELK<br>FLGPFSEGDTPAYLTGEFPGDYGWDTAGLSADPETFK<br>GPIQNDDHLANPTAVNAFAYATK<br>NGIPFGEAVWFK                                                                                             | 1.569313                                          | 0.191636 |
| LHCBM5                  | VNGGPAGEGLDK                                                                                                                                                                                                        | 1.150154                                          | 0.345649 |
| CP43                    | AAEYMTHAPLGLSLNSVGGVATEINAVNFVSPR<br>AMYFGGVYDTWAPGGGDVDR<br>DQETTGFVWWSGNAR<br>FDEPVLSMR<br>GIDRFDEPVLSMRPLD<br>GPWLEPLR<br>LGANVASAQGPTGLGK<br>LKNDIQPWQER<br>NDIQPWQER<br>SPTGEIIFGGETMR<br>VITNPTTNAAVIFGYLVK   | 1.183454                                          | 0.200762 |
| CP47                    | AQLGEIFEFDK<br>DVFAGIDDDINDQVEFGK<br>KAQLGEIFEFDK<br>LAFYDYIGNNPAK<br>MPTFFETFPVLLLDK<br>QGMFVLPFMTR<br>STLQSDGVFR<br>TGAMNSGDGIAVGWLGHASFK<br>VQASLAEGASLSDAWSR<br>YQWDQGGFFQEIQK<br>YSIEQVGVSVTFYGGELDGLTFTDPATVK | 1.151346                                          | 0.117750 |

| Protein         | Peptides                                                                                            | Ratio mean<br>( <sup>14</sup> N/ <sup>15</sup> N) | SD       |
|-----------------|-----------------------------------------------------------------------------------------------------|---------------------------------------------------|----------|
| LHCSR3          | DLGLPVTPLPDNLK                                                                                      | 2.256318                                          | 0.364134 |
| PSBR            | VGLNSIEDPVVK                                                                                        | 2.887469                                          | 0.534016 |
| $\alpha$ -CF1 " | AIESPAPGIVAR<br>IAEIPVGEAYLGR<br>QAINELYEEFK<br>SVYEPLATGLVAVDAMIPVGR<br>TAIAVDTILNQK<br>TPEELSNLIK | 1.065211                                          | 0.175358 |
| $\beta$ -CF1    | ELQDIHAILGLDELSEEDR<br>TAPAFVDLDTR                                                                  | 1.120346                                          | 0.033946 |

**Supplemental Table S3.** Quantitative proteomics data of Figure 7C

| Protein | Peptides                                                                                                                                                                                                                                | Ratio mean<br>( <sup>14</sup> N/ <sup>15</sup> N) | SD       |
|---------|-----------------------------------------------------------------------------------------------------------------------------------------------------------------------------------------------------------------------------------------|---------------------------------------------------|----------|
| PSBA    | FGQEEETYNIVA AHGYFGR<br>VLNTWADIINR                                                                                                                                                                                                     | 0.915335                                          | 0.018279 |
| PSBD    | AAEDPEFETFYTK<br>AFNPTQAEETYSMTANR<br>AWMAAQDQPHER<br>AYDFVSQEIR<br>LVFPEEVLPR<br>NILLNEGIR<br>TWFD DADDWLR                                                                                                                             | 0.895616                                          | 0.038690 |
| PSBH    | VNSDFQEPGLV TPLGLLLR<br>VNSDFQEPGLV TPLGLLLRPLNSEAGK                                                                                                                                                                                    | 0.945221                                          | 0.045258 |
| PSBO    | ADAEELLKENVK<br>EDDGIDYAATT VQLP GGER<br>GDFLVPSYR<br>GGSTGYD NAVALPAR<br>GSAVFSVAK<br>GSSFLDPK<br>GTLDNIK GDFLVPSYR<br>LTYTLDAMSGSFK<br>VAFLFTIK<br>VDPVTGEIAGVFESIQPSDTDLGAKPPKDIK<br>VGS DGS AELKEDDGIDYAATT VQLP GGER<br>VTGLWYAQLK | 0.954203                                          | 0.206472 |
| PSBP    | ENDFPGVILR<br>FLESVSYLLGK<br>HQLIGATVGS DNK<br>QAYSGETQSEGGFAPNR<br>SGFVPYAGDGFALLPAK<br>VSAASLLDVSTTTDKK<br>YEDNFDAVNNLVIAQD TDKK                                                                                                      | 3.642855                                          | 1.052493 |
| PSBQ    | DLDLPQNV R<br>EFIQAVEDLDFALR<br>FDLNTLASTK<br>GFDLIYEAR<br>IDADLDVFIQK                                                                                                                                                                  | 2.291525                                          | 0.791265 |
| PSBW    | DLGDFEDADDGLKL                                                                                                                                                                                                                          | 1.063709                                          | 0.164927 |
| LHCB4   | FADGLNNGK<br>FPTPPGTQK<br>GFDPLGLSKPSEFVVIGVDENDQNAAK<br>KYQGDALWLPNTTRPEWLDGSLPGDR                                                                                                                                                     | 1.086075                                          | 0.262131 |

| Protein                 | Peptides                                                                                                                                                                                                          | Ratio mean<br>( <sup>14</sup> N/ <sup>15</sup> N) | SD       |
|-------------------------|-------------------------------------------------------------------------------------------------------------------------------------------------------------------------------------------------------------------|---------------------------------------------------|----------|
| LHCB4                   | LAPYSEVFGLAR<br>NNKGSVEAIVQATPDEVSSNR                                                                                                                                                                             | 1.086075                                          | 0.262131 |
| LHCB5                   | FDSSVFDGLDPLYGGPFDPLGLADDPEVLQELK<br>GWLGGQGAADLDK<br>GWLGGQGAADLDKWYGPRK<br>HVADPFYNNLLTVLGAEER<br>KLFLPSGLYDR<br>LFLPSGLYDRSEIPEYLNAGELAGDYGYPDPLGLGKDPETVAK<br>SEIPEYLNAGELAGDYGYPDPLGLGKDPETVAK<br>YRENELLHAR | 1.068557                                          | 0.212815 |
| LHCBM1                  | ASTPDSFWYGPGR<br>GPLQNLSDHLANPGTNNAFAYATK<br>LYPGGSFDPLGLADDPDTFAELK<br>PLFLGAFTEPPSYLTGEFPDYGWDTAGLSADPETFK                                                                                                      | 2.534266                                          | 0.755221 |
| LHCBM3                  | GPIQNLDHLSNPTVNNAFAYATK<br>QAPASSGIEFYGPNR<br>SGTQFGEAVWFK                                                                                                                                                        | 2.700815                                          | 0.916661 |
| LHCBM4<br>and<br>LHCBM6 | GPVQNLDHLSNPTVNNAFAYATK                                                                                                                                                                                           | 1.830968                                          | 0.522198 |
| LHCBM2<br>and<br>LHCBM7 | ANGGPLGEGLDPLHPGAFDPLGLADDPDTFAELK<br>FLGPFSEGDTPAYLTGEFPDYGWDTAGLSADPETFKR<br>GPIQNLDHLSNPTAVNNAFAYATK<br>NGIPFGEAVWFK                                                                                           | 2.305643                                          | 0.655765 |
| LHCBM5                  | AGWWSNGGNEK<br>LHPGGQFFDPLGLAEDPDFAELK<br>LSAFYGPDR<br>NGTPIVEPVWFK                                                                                                                                               | 1.450154                                          | 0.345649 |
| CP43                    | AAEYMTHAPLGLSLNSVGGVATEINAVNFVSPR<br>AMYFGGVYDTWAPGGGDVDR<br>DQETTGFVWWSGNAR<br>GIDRFDEPVLSMRPLD<br>GPWLEPLRGPNGLDLTK<br>LGANVASAQGPTGLGK<br>SPTGEIIFGGETMR<br>VITNPTTNAAVIFGYLVK                                 | 0.913889                                          | 0.043640 |
| CP47                    | DVFAGIDDDINDQVEFGK<br>KAQLGEIFEFDR<br>LAFYDYIGNNPAK<br>RMPTFFETFPVLLLDKDGIVR<br>QGMFVLPFMTR<br>TGAMNSGDGIAGWLGHASFK                                                                                               | 0.905514                                          | 0.120713 |

| Protein         | Peptides                                                                                                                                                                                                                                                                                                                                                                                     | Ratio mean<br>( <sup>14</sup> N/ <sup>15</sup> N) | SD        |
|-----------------|----------------------------------------------------------------------------------------------------------------------------------------------------------------------------------------------------------------------------------------------------------------------------------------------------------------------------------------------------------------------------------------------|---------------------------------------------------|-----------|
| CP47            | VQASLAEGASLSDAWSR<br>YQWDQGGFFQQEIQK<br>YSIEQVGVSVTFYGGELDGLTFTDPATVK                                                                                                                                                                                                                                                                                                                        | 0.905514                                          | 0.120713  |
| LHCSR3          | DLGLPVTPLPDNLK<br>EAILELDDIER                                                                                                                                                                                                                                                                                                                                                                | 28.994430                                         | 10.385040 |
| PSBR            | VGLNSIEDPVVK<br>YGANVDGYSPIYTPDLWTESGDSYTLGTK                                                                                                                                                                                                                                                                                                                                                | 1.891174                                          | 0.164706  |
| $\alpha$ -CF1 " | AIESPAPGIVAR<br>AMSGELLEFEFGTLGIALNLEANNVGAVLLGDGLK<br>ASSVAQVLNTLK<br>DLIEQYTPEVK<br>EAYPGDVFYLHSR<br>IAEIPVGEAYLGR<br>LELAQFAELEAFSQFASDLLQATQNQLAR<br>MVDFGIVFQVGDGIAR<br>PTLIYDDLK<br>QAINELYEEFK<br>QPQSSPLSVEEQVASLYAGTNGYLDKLEVSQVR<br>STLTFTPEAEGLVK<br>SVYEPLATGLVAVDAMIPVGR<br>SYLANSYPK<br>TAIAVDTILNQK<br>TPEELSNIKDLIEQYTPEVK<br>VVDGLARPVDGK                                   | 1.238294                                          | 0.093626  |
| $\beta$ -CF1    | AHGGVSVFAGVGER<br>AVSMNPTEGLMR<br>DGSITSIQAVYVPADDLTDPAPATTF AHLDATTVLSR<br>DVNKQDVLFFIDNIFR<br>FVQAGAEVSALLGR<br>GIYPAVDPLESTSTMLQPWILGK<br>GMEVVDTGKPLSVPVGK<br>GQVPNIYNALTIR<br>IFAGELDDLPEQAFYLVGNITEAISK<br>IFNVLGEPVDNMGNVKVEETLPIHR<br>LSIFETGIK<br>MPSAVGYQPTLATEMGGQLER<br>TAPAFVDLDTR<br>TREGNDLYTEMK<br>TVLIMELINNIK<br>VALVYGMNEPPGAR<br>VVDLLAPYR<br>YKELQDIIAILGLDELSEEDRLIVAR | 1.182675                                          | 0.129173  |

**Supplemental Table S4.** Quantitative proteomics data of Figure 7D

| Protein | Peptides                      | Ratio mean<br>( <sup>14</sup> N/ <sup>15</sup> N) | SD       |
|---------|-------------------------------|---------------------------------------------------|----------|
| PSBA    | ANLGMEVMHER                   | 1.317301                                          | 0.207086 |
|         | ETTENESANEGYR                 |                                                   |          |
|         | FGQEEETYNIVAAHGYFGR           |                                                   |          |
|         | VLNTWADIINR                   |                                                   |          |
| PSBD    | AAEDPEFETFYTK                 | 1.420160                                          | 0.064670 |
|         | AFNPTQAEETYSMVTANR            |                                                   |          |
|         | AWMAAQDQIPHER                 |                                                   |          |
|         | AYDFVSQEIR                    |                                                   |          |
|         | LVFPPEVLPR                    |                                                   |          |
|         | NILLNEGIR                     |                                                   |          |
|         | TWFDDADDWLR                   |                                                   |          |
| PSBH    | VNSDFQEPGLVTPGLTLLR           | 1.760052                                          | 0.307073 |
|         | VNSDFQEPGLVTPGLTLLRPLNSEAGK   |                                                   |          |
| PSBO    | ADAEELLKENVK                  | 1.821720                                          | 0.483510 |
|         | EDDGIDYAATTVQLPgger           |                                                   |          |
|         | GDFLVPSYR                     |                                                   |          |
|         | GGSTGYDNAVALPAR               |                                                   |          |
|         | GSAVFSVAK                     |                                                   |          |
|         | GSSFDPK                       |                                                   |          |
|         | LTYTLDAMSGSFK                 |                                                   |          |
|         | VAFLETK                       |                                                   |          |
|         | VDPVTGEIAGVFESIQPSDTDLGAKPPK  |                                                   |          |
|         | VGSDGSAELKEDDGIDYAATTVQLPgger |                                                   |          |
|         | VTGLWYAQLK                    |                                                   |          |
| PSBP    | ENDFPGVILR                    | 3.642855                                          | 1.152493 |
|         | FLESVSYLLGK                   |                                                   |          |
|         | HQLIGATVGSNDK                 |                                                   |          |
|         | QAYSGETQSEGGFAPNR             |                                                   |          |
|         | SGFVPYAGDGFALLPAK             |                                                   |          |
|         | VSAASLLDVSTTTDKK              |                                                   |          |
|         | YEDNFDVNNLVVIAQDTDK           |                                                   |          |
|         |                               |                                                   |          |
| PSBQ    | AKLDSVLA AVL                  | 2.357266                                          | 1.072902 |
|         | DLDPQNR                       |                                                   |          |
|         | EFIQAVEDLDFALR                |                                                   |          |
|         | FDLNLTASTK                    |                                                   |          |
|         | GFDLIYEAR                     |                                                   |          |
|         | IDADLDVFIQK                   |                                                   |          |
| PSBW    | DLGDFEDADDGLKL                | 1.063709                                          | 0.164927 |
| LHCB4   | FPTPPGTQK                     | 1.265684                                          | 0.430443 |
|         | GSVEAIVQATPDEVSSNR            |                                                   |          |



| Protein                 | Peptides                                                                                                                                                                         | Ratio mean<br>( <sup>14</sup> N/ <sup>15</sup> N) | SD       |
|-------------------------|----------------------------------------------------------------------------------------------------------------------------------------------------------------------------------|---------------------------------------------------|----------|
| LHCB4                   | FRECELIHGR<br>KYQGDALWLPNTRPEWLDGSLPGDR<br>LAPYSEVFGLAR<br>PSEFVVIGVDENDQNAAK<br>GFDPLGLSKPSEFVVIGVDENDQNAAK                                                                     | 1.265684                                          | 0.430443 |
| LHCB5                   | FDSSVFDGLDPLYPGGPFDPGLLADDP<br>EVLQELK<br>GWLGGQGAADLDKWYGPDR<br>HVADPFGYNLLTVLGAEER<br>KFLPSGLYDR<br>NGTGPAGYSPGIGK<br>SEIPEYLNAGELAGDYGYD<br>YRENELLHAR                        | 1.068557                                          | 0.212814 |
| LHCBM1                  | ASTPDSFWYGPGR<br>GPLQNLSHDHLANPGTNNAFAYATK<br>LYPGGSFDPLGLADDPDTFAELK<br>PLFLGAFTGEPPSYLTGEFPGDYGWDTAGLSADVNGGP<br>LGEGLDK                                                       | 3.538052                                          | 0.702943 |
| LHCBM4<br>and<br>LHCBM6 | GPVQNDDHLANPTVNNAFAFATK                                                                                                                                                          | 2.845682                                          | 0.681379 |
| LHCBM2<br>and<br>LHCBM7 | ANGGPLGEGLDPLHPGGAFDPLGLADDPDTFAELK<br>FLGPFSEGDTPAYLTGEFPGDYGWDTAGLSADP<br>ETFKR<br>GPIQNDDHLANPTAVNAFAYATK<br>NGIPFGEAVWFK                                                     | 2.342341                                          | 0.656609 |
| LHCBM3                  | GPIQNDDHLSNPTVNNAFAFATK<br>QAPASSGIEFYGPNR<br>SGTQFGEAVWFK                                                                                                                       | 2.832832                                          | 0.824732 |
| LHCBM5                  | AGWWSNGGNEK<br>LHPGGQFFDPLGLAEDPDFAELK<br>LSAFYGPDR<br>NGTPIVEPVWFK                                                                                                              | 1.450154                                          | 0.345649 |
| CP43                    | AAEYMTAPLGLSLNSVGGVATEINAVNFVSPR<br>AMYFGGVYDTWAPGGGDVR<br>DQETTGFVWWSGNAR<br>FDEPVLSMRPLD<br>GIDRFDEPVLSMR<br>GPWLEPLR<br>LGANVASAQGPTGLGK<br>LKNDIQPWQER<br>VITNPTTNAAVIFGYLVK | 1.307824                                          | 0.143116 |

| Protein | Peptides                                                                                                                                                                                                                                                                                                                                                    | Ratio mean<br>( <sup>14</sup> N/ <sup>15</sup> N) | SD       |
|---------|-------------------------------------------------------------------------------------------------------------------------------------------------------------------------------------------------------------------------------------------------------------------------------------------------------------------------------------------------------------|---------------------------------------------------|----------|
| CP43    | SPTGEIIFGGETMR                                                                                                                                                                                                                                                                                                                                              | 1.307824                                          | 0.143116 |
| CP47    | DVFAGIDDDINDQVEFGK<br>KAQLGEIFEFDR<br>LAFYDYIGNNPAK<br>MPTFFETFPVLLLDKDGIVR<br>QGMFVLPFMTR<br>STLQSDGVFR<br>TGAMNSGDGIAGVWLGHASFK<br>VHTVVINDPGR<br>VQASLAEGASLSDAWSR<br>YQWDQGGFFQQEIQK<br>YSIEQVGVSVTFYGGELDGLTFTDPATVK                                                                                                                                   | 1.740408                                          | 0.194429 |
| LHCSR3  | DLGLPVTPLPDNLK<br>EAILELDDIER                                                                                                                                                                                                                                                                                                                               | 28.994430                                         | 8.385042 |
| PSBR    | VGLNSIEDPVVK<br>YGANVDGYSPIYTPDLWTESGDSYTLGTK                                                                                                                                                                                                                                                                                                               | 2.507445                                          | 0.190226 |
| α-CF1 " | AIESPAPGIVAR<br>AMSGELLEFDGTLGIALNLEANNVGAVLLGDGLK<br>ASSVAQVLNTLK<br>DLIEQYTPEVK<br>EAYPGDVFYLHSR<br>IAEIPVGEAYLGR<br>LELAQFAELEAFSQFASDLQATQNQLAR<br>MVDFGIVFQVGDGIAR<br>PTLTIYDDLK<br>QAINLEYLEEFK<br>QPQSSPLSVEEQVASLYAGTNGYLDKLEVSQVR<br>STLTFTPEAEGLVK<br>SVYEPLATGLVAVDAMIPVGR<br>SYLANSYPK<br>TAIAVDTILNQK<br>TPEELSNLIKDLIEQYTPEVK<br>VVDGLARPVDGK | 0.874402                                          | 0.078655 |
| β-CF1   | AHGGVSVFAGVGER<br>AVSMNPTEGLMR<br>DGSITSIQAVYVPADDLTDPAATTFAHLDATTVLSR<br>DVNKQDVLFFIDNIFR<br>FVQAGAEVSALLGR<br>GIYPAVDPLESTSTMLQPWILGEK<br>GMEVVDTGKPLSVPVGK<br>GQVPNIYNALTIR<br>IFAGELDDLPEQAFYLVGNITEAISK                                                                                                                                                | 0.801150                                          | 0.077406 |

| Protein | Peptides                                                                                                                                                                                      | Ratio mean<br>( <sup>14</sup> N/ <sup>15</sup> N) | SD       |
|---------|-----------------------------------------------------------------------------------------------------------------------------------------------------------------------------------------------|---------------------------------------------------|----------|
| β-CF1   | IFNVLGEPVDNMGNVKVEETLPIHR<br>LSIFETGIK<br>MPSAVGYQPTLATEMGGGLQER<br>TAPAFVDLDTR<br>TREGNDLYTEMK<br>TVLIMELINNIK<br>VALVYQMNEPPGAR<br>VVDLLAPYR<br>YKELQDIHAILGLDELSEEDRLIVAR<br>YVSLAETIEGFGK | 0.801150                                          | 0.077406 |

**Supplemental Table S5.** Proteomics analysis of polypeptides of PSII-LHCII supercomplex from WT and FUD39

The 100µl PSII-LHCII supercomplex fractions from 24h HL SDGs of WT and FUD 39 were digested with trypsin in 30k filter devices (Millipore) as FASP methods described in the literature (Wiśniewski et al. 2009). Peptides were collected by centrifugation of the filter units and analyzed with by electrospray liquid chromatography–tandem MS (LC-MS/MS) using a linear ion trap–orbitrap instrument (LTQ).

| PSII-LHCII<br>supercomplex<br>Protein | WT             |                       | FUD39          |                       |
|---------------------------------------|----------------|-----------------------|----------------|-----------------------|
|                                       | Spectral count | Number of<br>peptides | Spectral count | Number of<br>peptides |
| CP47                                  | 57             | 13                    | 60             | 11                    |
| CP43                                  | 62             | 15                    | 22             | 11                    |
| PSBA                                  | 38             | 5                     | 12             | 5                     |
| PSBD                                  | 55             | 7                     | 15             | 8                     |
| PSBO                                  | 24             | 9                     | 12             | 8                     |
| PSBP                                  | 4              | 3                     |                |                       |
| PSBQ                                  | 2              | 1                     |                |                       |
| PSBR                                  | 7              | 1                     | 2              | 2                     |
| PSBH                                  | 9              | 2                     | 3              | 1                     |
| LHCB4                                 | 23             | 8                     | 14             | 9                     |
| LHCB5                                 | 31             | 11                    | 12             | 8                     |
| LHCBM1                                | 1              | 1                     | 8              | 4                     |
| LHCBM3                                | 1              | 1                     | 3              | 2                     |
| LHCBM3/6                              | 1              | 1                     | 2              | 2                     |
| LHCBM4/6                              | 1              | 1                     | 5              | 3                     |
| LHCBM2/7                              | 1              | 1                     | 3              | 3                     |
| LHCBM5                                | 2              | 1                     | 1              | 1                     |
| LHCBM3/4/9                            | 1              | 1                     | 1              | 1                     |
| Cytochrome b559<br>alpha subunit      | 1              | 1                     | 1              | 1                     |
| Cytochrome b559<br>beta subunit       | 1              | 1                     | 1              | 1                     |

**Supplemental Table S6.** Quantitative proteomics data of Figure 9A

| Protein | Peptides                     | Ratio mean<br>( <sup>14</sup> N/ <sup>15</sup> N) | SD        |
|---------|------------------------------|---------------------------------------------------|-----------|
| PSBA    | ANLGMEVMHER                  | 2.171896                                          | 0.278818  |
|         | ENSSLWAR                     |                                                   |           |
|         | ETTENESANEGYR                |                                                   |           |
|         | EWELSFR                      |                                                   |           |
|         | RENSSLWAR                    |                                                   |           |
|         | FGQEEETYNIVAAHGYFGR          |                                                   |           |
|         | VLNTWADIINR                  |                                                   |           |
|         | VNSDFQEPGLVTPGLTLLR          |                                                   |           |
|         | VNSDFQEPGLVTPGLTLLRPLNSEAGK  |                                                   |           |
|         | VNSDFQEPGLVTPGLTLLRPLNSEAGK  |                                                   |           |
| PSBD    | AAEDPEFETFYTK                | 2.056777                                          | 0.289577  |
|         | AFNPTQAEETYSMVTANR           |                                                   |           |
|         | AWMAAQDQIPHER                |                                                   |           |
|         | AYDFVSQEIR                   |                                                   |           |
|         | LVFPPEVLPR                   |                                                   |           |
|         | NILLNEGIR                    |                                                   |           |
|         | TIAIGTYQEK                   |                                                   |           |
|         | TWFDDADDWLR                  |                                                   |           |
| PSBH    | VNSDFQEPGLVTPGLTLLR          | 2.157495                                          | 0.0481684 |
|         | VNSDFQEPGLVTPGLTLLRPLNSEAGK  |                                                   |           |
| PSBO    | ADAEELLK                     | 2.858039                                          | 0.455611  |
|         | ADAEELLKENVK                 |                                                   |           |
|         | EDDGIDYAATTVQLPGER           |                                                   |           |
|         | GDFLVPSYR                    |                                                   |           |
|         | GGSTGYDNAVALPAR              |                                                   |           |
|         | GSAVFSVAK                    |                                                   |           |
|         | GSSFLDPK                     |                                                   |           |
|         | LYTLDAMSGSFK                 |                                                   |           |
|         | VAFLETK                      |                                                   |           |
|         | VDPVTGEIAGVFESIQPSDTDLGAKPPK |                                                   |           |
|         | VGSDGSAELKEDDGIDYAATTVQLPGER |                                                   |           |
|         | VTGLWYAQLK                   |                                                   |           |
| LHCB4   | FADGLNNGK                    | 2.038196                                          | 0.146513  |
|         | FPTPPGTQK                    |                                                   |           |
|         | GFDPLGLSKPSEFVVIGVDENDQNAAK  |                                                   |           |
|         | GSVEAIVQATPDEVSSNR           |                                                   |           |
|         | KYQGDALWLPNTRPEWLDGSLPGDR    |                                                   |           |
|         | LAPYSEVFLAR                  |                                                   |           |
|         | NNKGSVEAIVQATPDEVSSNR        |                                                   |           |
|         | PSEFVVIGVDENDQNAAK           |                                                   |           |
|         | YQGDALWLPNTRPEWLDGSLPGDR     |                                                   |           |
|         | YQGDALWLPNTRPEWLDGSLPGDR     |                                                   |           |

| Protein                 | Peptides                                                                                                                                                                                                                                               | Ratio mean<br>( <sup>14</sup> N/ <sup>15</sup> N) | SD       |
|-------------------------|--------------------------------------------------------------------------------------------------------------------------------------------------------------------------------------------------------------------------------------------------------|---------------------------------------------------|----------|
| LHCBS                   | ENELLHAR<br>FDSSVFDGLDPLYGGPFDPGLGLADDPEVLQELK<br>GWLGGQGAADLDK<br>GWLGGQGAADLDKWYGPDR<br>HVADPFGYNLLTVLGAER<br>KLFLPSGLYDR<br>LFLPSGLYDR<br>NGTGPAGYSPGIGK<br>SEIPEYLNAGELAGDYGYDPLGLGK<br>SEIPEYLNAGELAGDYGYDPLGLGKDPETVAK<br>WYGPDRK<br>YRENELLHAR  | 2.029510                                          | 0.171230 |
| LHCBM1                  | ASTPDSFWYGPGR<br>GPLQNLSDHLANPGTNNAFAYATK<br>LYPGGSFDPLGLADDPDTFAELK<br>VNGGPLGEGLDK                                                                                                                                                                   | 0.9293594                                         | 0.045767 |
| LHCBM3                  | GPIQNLDHLSNPTVNNAFATK<br>QAPASSGIEFYGPNR<br>SGTQFGEAVWFK                                                                                                                                                                                               | 1.375893                                          | 0.051150 |
| LHCBM4/6/8              | SSGVEFYGPNR                                                                                                                                                                                                                                            | 1.129030                                          | 0.250721 |
| LHCBM2<br>and<br>LHCBM7 | ANGGPLGEGLDPLHPGGAFDPLGLADDPDTFAELK<br>FLGPFSEGDTPAYLTGEFPGDYGWDTAGLSADPETFKR<br>GPIQNLDHLSNPTAVNAFAYATK<br>NGIPFGEAVWFK                                                                                                                               | 1.262367                                          | 0.252905 |
| LHCBM5                  | VNGGPAGEGLDK<br>LHPGGQFFDPLGLAEDPDFAELK<br>LSAFYGPDR                                                                                                                                                                                                   | 0.755537                                          | 0.194373 |
| CP43                    | AAEYMTHAPLGLSLNSVGGVATEINAVNFVSPR<br>AMYFGGVYDTWAPGGGDVDR<br>DQETTGFVWWSGNAR<br>FDEPVLSMRPLD<br>GIDRFDEPVLSMRPLD<br>GPNGLDLNK<br>GPWLEPLR<br>GPWLEPLRGPNGLDLNK<br>LGANVASAQGPTGLGK<br>LKNDIQPWQER<br>NDIQPWQER<br>SPTGEIIFGGETMR<br>VITNPTTNAAVIFGYLVK | 2.051706                                          | 0.240605 |
| CP47                    | ADVPRK<br>AQLGEIFEFDR                                                                                                                                                                                                                                  | 1.292974                                          | 0.247392 |

| Protein         | Peptides                                                                                                                                                                                                                     | Ratio mean<br>( <sup>14</sup> N/ <sup>15</sup> N) | SD       |
|-----------------|------------------------------------------------------------------------------------------------------------------------------------------------------------------------------------------------------------------------------|---------------------------------------------------|----------|
| CP47            | DVFAGIDDDINDQVEFGK<br>KAQLGEIFEFDK<br>KLGDTSSLR<br>LAFYDYIGNNPAK<br>LGD TSSLR<br>LGD TSSLREAF<br>MPTFFETFPVLLLDK<br>QGMFVLPFMTR<br>STLQSDGVFR<br>TGAMNSGDGIAVGWLGHASFK<br>VHTVVINDPGR<br>VQASLAEGASLSDAWSR<br>YQWDQGFFQQEIQK | 1.292974                                          | 0.247392 |
| LHCSR3          | EAILLEDDIER<br>TTAAEPQTAAPVAAEDVFAYTK                                                                                                                                                                                        | 2.636894                                          | 0.119513 |
| PSBR            | VGLNSIEDPVVK<br>YGANVDGYSPIYTPDLWTESGDSYTLGTK                                                                                                                                                                                | 2.744204                                          | 0.341450 |
| $\alpha$ -CF1 " | AIESPAPGIVAR<br>DLIEQYTPVVK<br>EMSLLLR<br>IAEIPVGEAYLGR<br>LEVSQVR<br>QAINELYEEFK<br>SVYEPLATGLVAVDAMIPVGR<br>TAIAVDTILNQK<br>TPEELSNLIK                                                                                     | 3.717900                                          | 0.585734 |
| $\beta$ -CF1    | DGSITSIQAVYVPADDLTPAPATTF AHL DATTVLSR<br>ELQDIIAILGLDELSEEDR<br>FVQAGAEVSALLGR<br>GMEVVD TGKPLSVPV GK<br>IFNVLGEPVDNMGNVK<br>QDVLFFIDNIFR<br>TAPAFVDLDTR<br>VALTALTMAEYFR<br>VALVYGQMNEPPGAR<br>VEETLPIHR<br>VVDLLAPYR      | 3.566088                                          | 0.487106 |
